# Supplementary material for: Rapid initiation of nasal saline irrigation to reduce severity in high-risk COVID+ outpatients: a randomized clinical trial compared to a national dataset observational arm
Source: bioRxiv or medRxiv preprint supplement (doi:10.1101/2021.08.16.21262044), 2021-12-08

# The Consort Flowchart

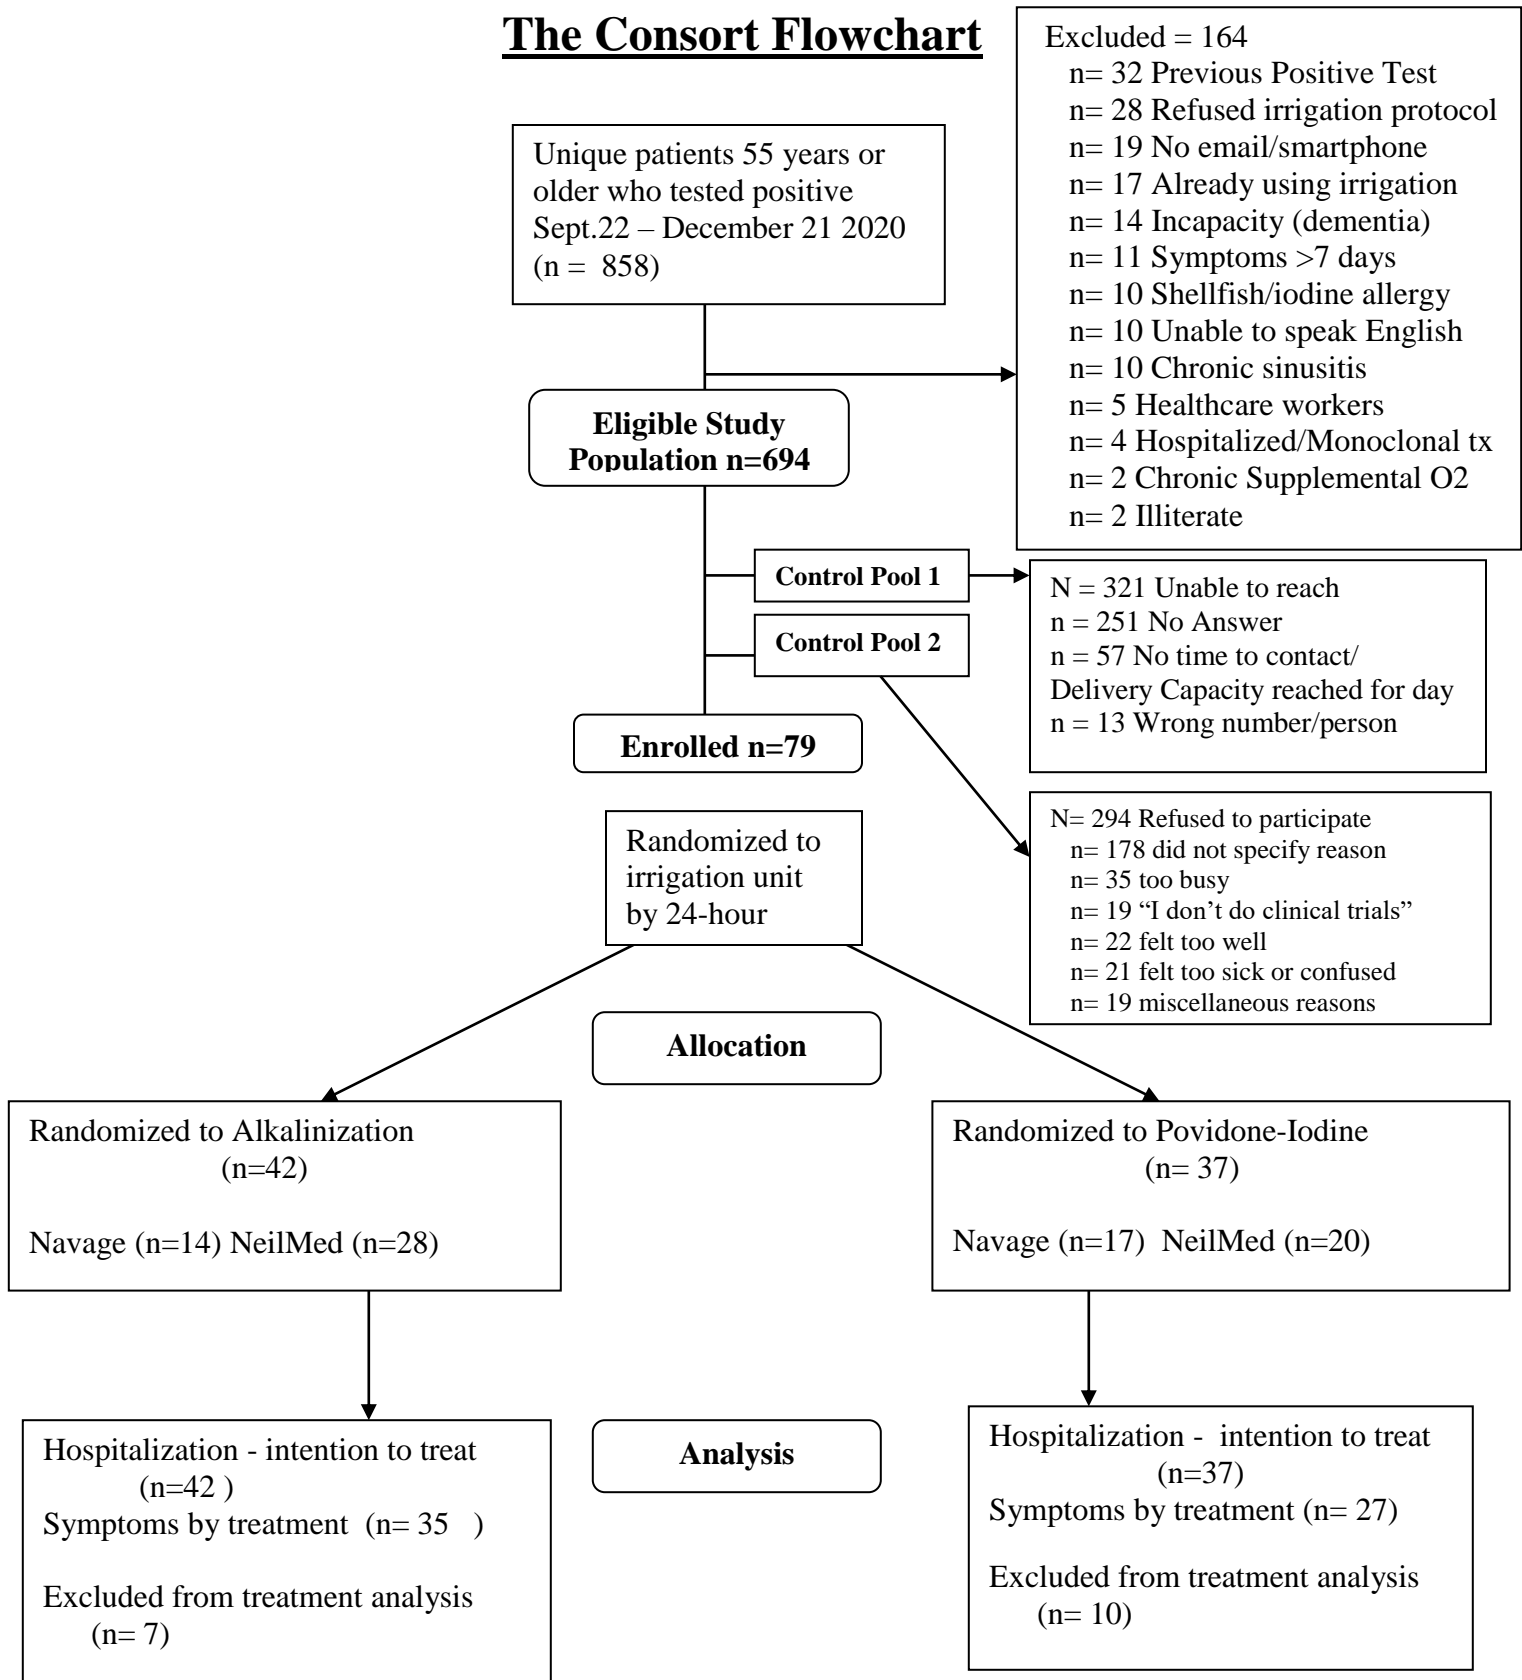

Supplement: Supplementary file [file media-1.pdf]
